# Supplementary material for: Roles of Toll-like receptor 2/4, monoacylglycerol lipase, and cyclooxygenase in social defeat stress-induced prostaglandin E2 synthesis in the brain and their behavioral relevance
Source: PubMed Central journal article supplement (PMC6879743; doi:10.1038/s41598-019-54082-5), 2019-11-26
Supplement: 41598_2019_54082_MOESM1_ESM.pdf [file 41598_2019_54082_MOESM1_ESM.pdf]

# Supplementary Information

## Roles of Toll-like receptor 2/4, monoacylglycerol lipase, and cyclooxygenase in social defeat stress-induced prostaglandin E<sub>2</sub> synthesis in the brain and their behavioral relevance

<sup>1-3</sup>Xiang Nie, <sup>1,2</sup>Shiho Kitaoka, <sup>4</sup>Masakazu Shinohara, <sup>3</sup>Akira Kakizuka, <sup>5</sup>Shuh Narumiya and <sup>1,2</sup>Tomoyuki Furuyashiki

<sup>1</sup>Division of Pharmacology, Graduate School of Medicine, Kobe University, Hyogo, Japan

<sup>2</sup>Japan Agency for Medical Research and Development (AMED), Tokyo, Japan

<sup>3</sup>Laboratory of Functional Biology, Graduate School of Biostudies, Kyoto University, Kyoto, Japan

<sup>4</sup>Division of Epidemiology, Graduate School of Medicine, Kobe University, Hyogo, Japan

<sup>5</sup>Department of Drug Discovery Medicine, Graduate School of Medicine, Kyoto University, Kyoto, Japan

Correspondence should be addressed to Tomoyuki Furuyashiki  
7-5-1 Kusunoki-cho, Chuo-ku, Kobe, Hyogo 650-0017, Japan  
TEL +81-78-382-5440; FAX +81-78-382-5459  
tfuruya@med.kobe-u.ac.jp

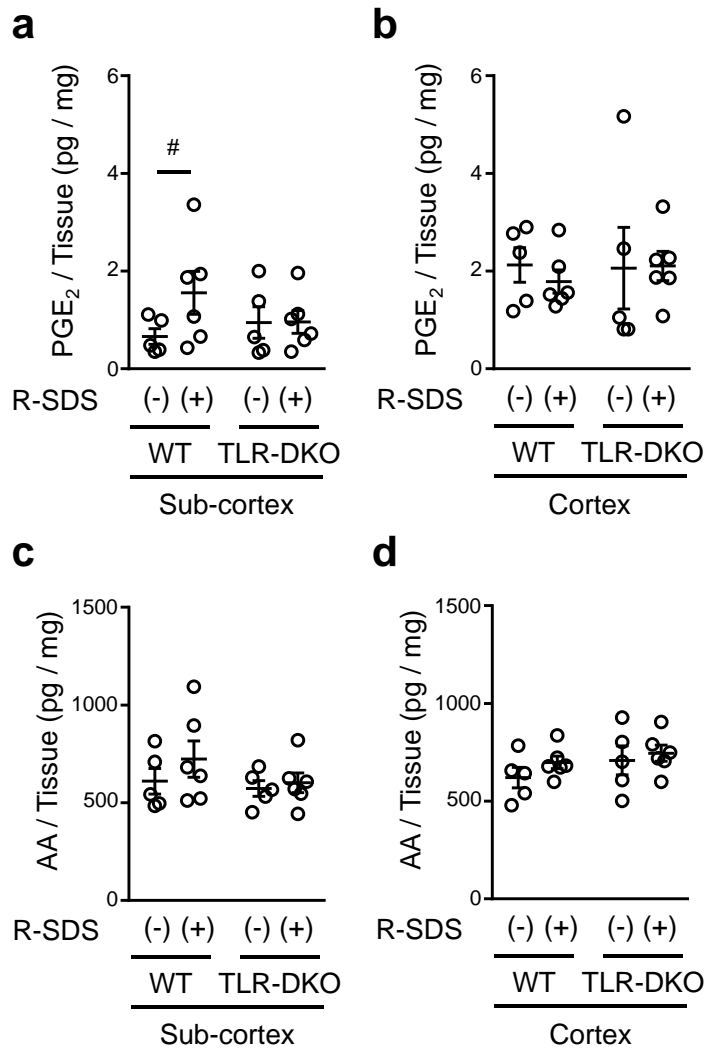

**Supplementary Figure S1.** LC-MS/MS confirmed that social defeat stress increases the PGE<sub>2</sub> contents in subcortical tissues in a TLR2/4-dependent manner. The contents of PGE<sub>2</sub> (a, b) and free arachidonic acid (AA) (c, d) in subcortical (a, c) and cortical (b, d) tissues of wild-type (WT) and TLR2/4 double knockout (TLR-DKO) mice with or without repeated SDS (R-SDS). #*P* = 0.09 for unpaired *t* test. Data are shown as means ± SEM.

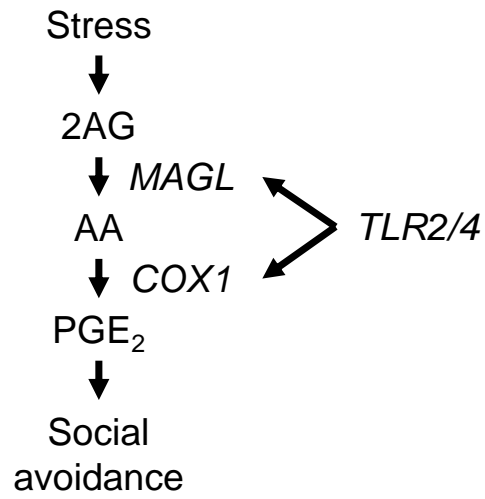

**Supplementary Figure S2.** Our proposal about stress-induced PGE<sub>2</sub> synthesis in the brain and its behavioral significance based on this study. Our findings suggest that stress increases the PGE<sub>2</sub> synthesis in subcortical regions of the brain through enzymatic activities of MAGL and COX1, the expression of which is enhanced by TLR2/4 activity, thereby leading to social avoidance. 2AG, 2-arachidonoylglycerol; AA, arachidonic acid; COX1, cyclooxygenase-1; MAGL, monoacylglycerol lipase; PGE<sub>2</sub>, prostaglandin E<sub>2</sub>; TLR, Toll-like receptor.
